# Supplementary material
Source: ML conference proceedings conference paper supplement (https://proceedings.neurips.cc/paper_files/paper/2020/hash/0ffaca95e3e5242ba1097ad8a9a6e95d-Abstract.html)
Supplement: Supplementary file [file 0ffaca95e3e5242ba1097ad8a9a6e95d-Supplemental.pdf]

---

# A Bayesian Nonparametrics View into Deep Representations

---

## Supplementary material

### A Collapsed Gibbs Sampling for DP-GMM

We estimate posterior distributions over DP-GMM parameters using Collapsed Gibbs Sampling (CGS) algorithm [Neal, 2000]. Here we describe CGS in more details. The derivation below closely follows the one from [Murphy, 2012, chapters 24.2.4 & 25.2.4].

CGS steps consist of iterative sampling of component indicators  $c_i$  for observations  $\mathbf{x}_i \in \mathcal{D}$ ,  $i = 1, \dots, N$ . During this sampling, CGS maintains a set of  $K$  components, where  $K$  itself is a random variable (components can be added or removed). Each component  $k \in \{1, \dots, K\}$  is described by a set  $\boldsymbol{\theta}_k$  of parameters of the Normal-inverse-Wishart posterior distribution over its mean  $\boldsymbol{\mu}_k$  and covariance  $\boldsymbol{\Sigma}_k$ :

$$p(\boldsymbol{\mu}_k, \boldsymbol{\Sigma}_k | \mathcal{D}) = p(\boldsymbol{\mu}_k, \boldsymbol{\Sigma}_k | \boldsymbol{\theta}_k) = NIW(\boldsymbol{\mu}_k, \boldsymbol{\Sigma}_k | \boldsymbol{\theta}_k), \quad \boldsymbol{\theta}_k = \{\mathbf{m}_k, \nu_k, \kappa_k, \mathbf{S}_k\}. \quad (1)$$

Given a vector of current component assignments  $\mathbf{c} = \{c_1, \dots, c_N\}$ , CGS samples a new assignment for  $\mathbf{x}_i$  from the conditional  $p(c_i | \mathbf{c}_{-i}, \mathbf{x}_i, \alpha, \boldsymbol{\theta})$ :

$$p(c_i = k | \mathbf{c}_{-i}, \mathbf{x}_i, \alpha, \boldsymbol{\theta}) \propto p(c_i = k | \mathbf{c}_{-i}, \alpha) p(\mathbf{x}_i | \mathbf{x}_{-i}, c_i = k, \mathbf{c}_{-i}, \boldsymbol{\theta}). \quad (2)$$

Here  $\mathbf{c}_{-i}$ ,  $\mathbf{x}_{-i}$  stand for, respectively, component assignments and the dataset with the  $i$ -th element removed;  $\boldsymbol{\theta}$  is the collection of all component parameters. The first term in the above product comes from the Chinese-Restaurant Process (CRP), and has the form:

$$p(c_i = k | \mathbf{c}_{-i}, \alpha) = \begin{cases} \frac{N_{k,-i}}{\alpha + N - 1} & \text{if } k \text{ already exists,} \\ \frac{\alpha}{\alpha + N - 1} & \text{if } k \text{ is a new component.} \end{cases} \quad (3)$$

The second term can be derived by noticing that given the component assignment ( $c_i = k$ ), observation  $\mathbf{x}_i$  becomes conditionally independent from observations assigned to other components:

$$p(\mathbf{x}_i | \mathbf{x}_{-i}, c_i = k, \mathbf{c}_{-i}, \boldsymbol{\theta}) = p(\mathbf{x}_i | \mathbf{x}_{-i,k}, \boldsymbol{\theta}_k), \quad (4)$$

where  $\mathbf{x}_{-i,k}$  are observations assigned to the  $k$ -th component, except  $\mathbf{x}_i$ . The above term has a closed-form solution computed by integrating out  $\boldsymbol{\mu}_k, \boldsymbol{\Sigma}_k$  parameters, namely a multivariate Student's  $t$ -distribution (more details are given in appendix B):

$$p(\mathbf{x}_i | \mathbf{x}_{-i,k}, \boldsymbol{\theta}_k) = p(\mathbf{x}_i | \boldsymbol{\theta}_k) = \int p(\mathbf{x}_i | \boldsymbol{\mu}_k, \boldsymbol{\Sigma}_k) p(\boldsymbol{\mu}_k, \boldsymbol{\Sigma}_k | \boldsymbol{\theta}_k) d\boldsymbol{\mu}_k d\boldsymbol{\Sigma}_k. \quad (5)$$

When  $k$  is a new (empty) component, the above density reduces to the Student's  $t$ -distribution with parameters derived from the NIW prior hyper-parameters, i.e. from  $\boldsymbol{\theta}_0 = \{\mathbf{m}_0, \nu_0, \kappa_0, \mathbf{S}_0\}$ :

$$p(\mathbf{x}_i | \boldsymbol{\theta}_0) = \int p(\mathbf{x}_i | \boldsymbol{\mu}_k, \boldsymbol{\Sigma}_k) p(\boldsymbol{\mu}_k, \boldsymbol{\Sigma}_k | \boldsymbol{\theta}_0). \quad (6)$$

Note also that the density from which we are sampling component assignments  $p(c_i | \mathbf{c}_{-i}, \mathbf{x}_i, \alpha, \boldsymbol{\theta})$  is a categorical distribution over  $c_i$ . After sampling from it, one has to update the parameters of the NIW posterior of the newly sampled component (to account for the new member  $\mathbf{x}_i$ ). Further, before calculating any quantities necessary to compute  $p(c_i | \mathbf{c}_{-i}, \mathbf{x}_i, \alpha, \boldsymbol{\theta})$  (e.g. predictive densities for  $\mathbf{x}_i$ ), observation  $\mathbf{x}_i$  must be removed from the old component, reflecting the conditioning on  $\mathbf{x}_{-i,k}$ .

The probability distribution for component assignments (Eqn. 2) depends on  $\alpha$ , i.e. the concentration parameter in the Dirichlet Process prior. We do not assume a fixed value for  $\alpha$ , but explicitly account

for its uncertainty by treating it as a model parameter. To this end, we put a  $Gamma(1, 1)$  prior on  $\alpha$ . Under this prior the conditional  $p(\alpha | K, N)$  – which is required by CGS – admits a simple sampling [Escobar and West, 1995].

We choose the values of hyper-parameters  $\theta_0$  in a way that puts a weakly-informative, data-dependent prior on component means and covariances. Specifically, we follow guidelines in [Fraley and Raftery, 2007], and set the  $\theta_0$  values to:

$$\begin{aligned} \mathbf{m}_0 &= \frac{1}{N} \sum_{i=1}^N \mathbf{x}_i, \quad \mathbf{S}_0 = \frac{\text{diag}(\mathbf{S}_{\bar{x}})}{K_0^{2/D}}, \\ \nu_0 &= D + 2, \quad \kappa_0 = 0.01, \end{aligned} \quad (7)$$

where  $D$  is the data dimensionality, and:

$$K_0 = \alpha \log \left( 1 + \frac{N}{\alpha} \right), \quad \mathbf{S}_{\bar{x}} = \frac{1}{N} \sum_{i=1}^N (\mathbf{x}_i - \mathbf{m}_0) (\mathbf{x}_i - \mathbf{m}_0)^T. \quad (8)$$

Here,  $K_0$  is the prior expectation for the number of components and  $\mathbf{S}_{\bar{x}}$  is the empirical covariance.

## B DP-GMM posterior predictive distribution

Here we derive the formula for the Posterior Predictive distribution given component assignments:  $p(\mathbf{x}^* | \mathcal{D}, \mathbf{c})$ . The output from CGS is a Markov chain, where at each step we have component assignments  $\mathbf{c} = \{c_i\}_{i=1}^N$  and posterior distributions  $p(\boldsymbol{\mu}_k, \boldsymbol{\Sigma}_k | \mathcal{D})$  over component parameters  $\{\boldsymbol{\mu}_k, \boldsymbol{\Sigma}_k\}_{k=1}^K$ . Because of the conjugate NIW prior choice for means and covariances, the posterior is also a NIW distribution:

$$p(\boldsymbol{\mu}_k, \boldsymbol{\Sigma}_k) = NIW(\boldsymbol{\mu}_k, \boldsymbol{\Sigma}_k | \mathbf{m}_k, \nu_k, \kappa_k, \mathbf{S}_k). \quad (9)$$

The posterior predictive over a new observation  $\mathbf{x}^*$  given the dataset  $\mathcal{D}$  and component assignments  $\mathbf{c}$  can be written as:

$$\begin{aligned} p(\mathbf{x}^* | \mathcal{D}, \mathbf{c}) &= \int p(\mathbf{x}^* | \boldsymbol{\theta}, \mathbf{c}) p(\boldsymbol{\theta} | \mathcal{D}, \mathbf{c}) d\boldsymbol{\theta} \\ &= \int \left[ \sum_{k=1}^K p(\mathbf{x}^* | \boldsymbol{\theta}_k) p(c^* = k | \mathbf{c}) \right] p(\boldsymbol{\theta} | \mathcal{D}, \mathbf{c}) d\boldsymbol{\theta}. \end{aligned} \quad (10)$$

Posterior over component parameters expands to:

$$p(\boldsymbol{\theta} | \mathcal{D}, \mathbf{c}) = p(\{\boldsymbol{\mu}_k, \boldsymbol{\Sigma}_k\}_{k=1}^K | \mathcal{D}, \mathbf{c}) = \prod_{k=1}^K p(\boldsymbol{\mu}_k, \boldsymbol{\Sigma}_k | \mathcal{D}_k). \quad (11)$$

Above, we leverage the fact that given component assignments the posterior over joint set of parameters factorizes over components;  $\mathcal{D}_k$  denotes observations assigned to the  $k$ -th component, i.e  $\mathcal{D}_k = \{\mathbf{x}_i : c_i = k\}$ . From the model definition it is clear that:

$$p(\mathbf{x}^* | c^* = k) = p(\mathbf{x}^* | \boldsymbol{\mu}_k, \boldsymbol{\Sigma}_k). \quad (12)$$

Now, let  $\alpha_k = p(c^* = k | \mathbf{c})$  be the predictive mixture weights. By plugging Eqns. 11 and 12 into Eqn. 10 we obtain:

$$\begin{aligned} &\int \left[ \sum_{k=1}^K \alpha_k p(\mathbf{x}^* | \boldsymbol{\mu}_k, \boldsymbol{\Sigma}_k) \right] \prod_{j=1}^K p(\boldsymbol{\mu}_j, \boldsymbol{\Sigma}_j | \mathcal{D}_j) d\boldsymbol{\mu} d\boldsymbol{\Sigma} \\ &= \sum_{k=1}^K \int \alpha_k p(\mathbf{x}^* | \boldsymbol{\mu}_k, \boldsymbol{\Sigma}_k) \prod_{j=1}^K p(\boldsymbol{\mu}_j, \boldsymbol{\Sigma}_j | \mathcal{D}_j) d\boldsymbol{\mu} d\boldsymbol{\Sigma} \\ &= \sum_{k=1}^K \int \left[ \int \alpha_k p(\mathbf{x}^* | \boldsymbol{\mu}_k, \boldsymbol{\Sigma}_k) p(\boldsymbol{\mu}_k, \boldsymbol{\Sigma}_k | \mathcal{D}_k) d\boldsymbol{\mu}_k d\boldsymbol{\Sigma}_k \right] \prod_{j \neq k} p(\boldsymbol{\mu}_j, \boldsymbol{\Sigma}_j | \mathcal{D}_j) d\boldsymbol{\mu}_{-k} d\boldsymbol{\Sigma}_{-k} \\ &= \sum_{k=1}^K \alpha_k \int p(\mathbf{x}^* | \boldsymbol{\mu}_k, \boldsymbol{\Sigma}_k) p(\boldsymbol{\mu}_k, \boldsymbol{\Sigma}_k | \mathcal{D}_k) d\boldsymbol{\mu}_k d\boldsymbol{\Sigma}_k, \end{aligned} \quad (13)$$

where  $\boldsymbol{\mu}_{-k}$  and  $\boldsymbol{\Sigma}_{-k}$  are jointly means and covariances of components other than the  $k$ -th one. Expression under the last integral in Eqn. 13 is tractable, thanks to the conjugacy of the Normal-inverse-Wishart prior to the Gaussian likelihood. Specifically, it is the probability density function of a multivariate Student’s t-distribution Murphy [2012, 2007]:

$$\begin{aligned} & \int \mathcal{N}(\mathbf{x}^* | \boldsymbol{\mu}_k, \boldsymbol{\Sigma}_k) NIW(\boldsymbol{\mu}_k, \boldsymbol{\Sigma}_k | \mathbf{m}_k, \nu_k, \kappa_k, \mathbf{S}_k) d\boldsymbol{\mu}_k d\boldsymbol{\Sigma}_k \\ &= St\left(\mathbf{x}^* | \mathbf{m}_k, \frac{\kappa_k + 1}{\kappa_k(\nu_k - D + 1)} \mathbf{S}_k, \nu_k - D + 1\right). \end{aligned} \quad (14)$$

Finally, posterior predictive density (10) can be written as a mixture of multivariate Student’s t-distributions with weights  $\{\alpha_{k=1}^K\}$ :

$$p(\mathbf{x}^* | \mathcal{D}, \mathbf{c}) = \sum_{k=1}^K \alpha_k St(\mathbf{x}^* | \mathbf{m}_k, \beta_k \mathbf{S}_k, \nu_k - D + 1), \quad \beta_k = \frac{\kappa_k + 1}{\kappa_k(\nu_k - D + 1)}. \quad (15)$$

The only thing left is to derive the predictive mixture weights:  $\{\alpha_{k=1}^K\}$ . Recall that  $\alpha_k$  is the probability of choosing the  $k$ -th component for a new observation given the existing component assignments  $\mathbf{c}$ . The set of predictive weights  $\{\alpha_{k=1}^K\}$  therefore forms a categorical distribution  $p(\mathbf{c}^* | \mathbf{c})$  over the components. It can be calculated by marginalizing out the Dirichlet distributed component weights:

$$\begin{aligned} \alpha_k &= p(\mathbf{c}^* = k | \mathbf{c}) = \int p(\mathbf{c}^* = k | \boldsymbol{\pi}) p(\boldsymbol{\pi} | \mathbf{c}) d\boldsymbol{\pi} \\ &= \int \text{Cat}(\mathbf{c}^* = k | \boldsymbol{\pi}) \text{Dir}(\boldsymbol{\pi} | \mathbf{c}) d\boldsymbol{\pi} = \frac{N_k + \alpha_0}{N(1 + \alpha_0)}, \end{aligned} \quad (16)$$

where  $\alpha_0$  is the concentration parameter in the Dirichlet Process prior and  $N_k$  is the number of observations assigned to the  $k$ -th component. Note that predictive mixture weights depend only on the concentration parameter and the number of observations assigned to each component.

## C CNN experiment details and additional results

**Datasets and image augmentation.** CNN experiments (Section 4) were run on CIFAR-10 [Krizhevsky, 2009] and Mini-ImageNet [Vinyals et al., 2016] datasets. To adapt Mini-ImageNet to a typical image classification task, we concatenated the provided training, validation and test subsets (without support and evaluation splits in training data) and then randomly split the dataset into 50,000 training and 10,000 test examples. Finally, we resized the images to  $42 \times 42$  pixels. CIFAR experiments used the standard train/test split. Image augmentation was implemented as a random  $32 \times 32$  (CIFAR) or  $42 \times 42$  (Mini-ImageNet) pixel crop from an input with 4 (CIFAR) or 5 (Mini-ImageNet) pixel padding, followed by a random horizontal flip.

**Network architectures and training hyper-parameters.** CNN architectures used in experiments are summarized in Table C.1. All networks were trained for 60 epochs using stochastic gradient descent with learning rate  $\epsilon = 0.01$ , momentum  $\mu = 0.9$  (with Nesterov accelerated gradient),  $L_2$  penalty  $\lambda = 10^{-6}$  and a batch size equal to 512 examples. Networks with additional regularization had 20% dropout after each nonlinearity.

**Additional results.** Results for architectures not included in Section 4 are summarized in Fig. C.1. These results give further support to conclusions from main CNN experiments: a) memorizing networks learn more complex representations than networks trained on true labels, b) unlike image augmentation, dropout significantly increases representational complexity in CNNs; this effect diminishes with network width, and c) absent image augmentation, deep but narrow nets exhibit increased representational complexity in middle layers.

## D VAE experiment details and additional results

**Datasets.** VAE experiments were carried out on CelebA [Liu et al., 2015] and Anime [Ani] datasets. CelebA examples were prepared by taking a  $150 \times 150$  central crop and resizing it to  $64 \times 64$  pixels. Anime images were resized to  $96 \times 96$  pixels. Both datasets were randomly split into train/test subsets: 150000/52599 split for CelebA and 50000/13632 split for Anime images.

| CNN 11x512                                    | CNN 11x384                             | CNN 11x256                             | CNN 11x192                             | CNN 11x128                             |
|-----------------------------------------------|----------------------------------------|----------------------------------------|----------------------------------------|----------------------------------------|
| conv. $3 \times 3$<br>$c = 64$                | conv. $3 \times 3$<br>$c = 48$         | conv. $3 \times 3$<br>$c = 32$         | conv. $3 \times 3$<br>$c = 24$         | conv. $3 \times 3$<br>$c = 16$         |
| same                                          |                                        |                                        |                                        |                                        |
| conv. $3 \times 3$<br>$c = 128, s = 2$        | conv. $3 \times 3$<br>$c = 96, s = 2$  | conv. $3 \times 3$<br>$c = 64, s = 2$  | conv. $3 \times 3$<br>$c = 48, s = 2$  | conv. $3 \times 3$<br>$c = 32, s = 2$  |
| conv. $3 \times 3$<br>$c = 128$               | conv. $3 \times 3$<br>$c = 96$         | conv. $3 \times 3$<br>$c = 64$         | conv. $3 \times 3$<br>$c = 48$         | conv. $3 \times 3$<br>$c = 32$         |
| same                                          |                                        |                                        |                                        |                                        |
| conv. $3 \times 3$<br>$c = 256, s = 2$        | conv. $3 \times 3$<br>$c = 192, s = 2$ | conv. $3 \times 3$<br>$c = 128, s = 2$ | conv. $3 \times 3$<br>$c = 96, s = 2$  | conv. $3 \times 3$<br>$c = 64, s = 2$  |
| conv. $3 \times 3$<br>$c = 256$               | conv. $3 \times 3$<br>$c = 192$        | conv. $3 \times 3$<br>$c = 128$        | conv. $3 \times 3$<br>$c = 96$         | conv. $3 \times 3$<br>$c = 64$         |
| same                                          |                                        |                                        |                                        |                                        |
| conv. $3 \times 3$<br>$c = 512, s = 2$        | conv. $3 \times 3$<br>$c = 384, s = 2$ | conv. $3 \times 3$<br>$c = 256, s = 2$ | conv. $3 \times 3$<br>$c = 192, s = 2$ | conv. $3 \times 3$<br>$c = 128, s = 2$ |
| conv. $3 \times 3$<br>$c = 512$               | conv. $3 \times 3$<br>$c = 384$        | conv. $3 \times 3$<br>$c = 256$        | conv. $3 \times 3$<br>$c = 192$        | conv. $3 \times 3$<br>$c = 128$        |
| CIFAR: same; Mini-ImageNet: same with $s = 2$ |                                        |                                        |                                        |                                        |
| Fully Connected (logits)                      |                                        |                                        |                                        |                                        |

| CNN 8x256                                     | CNN 8x192                              | CNN 8x128                              |
|-----------------------------------------------|----------------------------------------|----------------------------------------|
| conv. $3 \times 3$<br>$c = 64$                | conv. $3 \times 3$<br>$c = 48$         | conv. $3 \times 3$<br>$c = 32$         |
| same                                          |                                        |                                        |
| conv. $3 \times 3$<br>$c = 128, s = 2$        | conv. $3 \times 3$<br>$c = 96, s = 2$  | conv. $3 \times 3$<br>$c = 64, s = 2$  |
| conv. $3 \times 3$<br>$c = 128$               | conv. $3 \times 3$<br>$c = 96$         | conv. $3 \times 3$<br>$c = 64$         |
| same                                          |                                        |                                        |
| conv. $3 \times 3$<br>$c = 256, s = 2$        | conv. $3 \times 3$<br>$c = 192, s = 2$ | conv. $3 \times 3$<br>$c = 128, s = 2$ |
| conv. $3 \times 3$<br>$c = 256$               | conv. $3 \times 3$<br>$c = 192$        | conv. $3 \times 3$<br>$c = 128$        |
| CIFAR: same; Mini-ImageNet: same with $s = 2$ |                                        |                                        |
| Fully Connected (logits)                      |                                        |                                        |

Table C.1: CNN architectures used in experiments (Section 4). Each convolutional layer is followed by batch normalization and ReLU nonlinearity. Dropout – when used – is applied after ReLU. All conv layers use 1 pixel zero-padding.  $c$  - number of output channels;  $s$  - layer stride (default 1).

**Model architectures and training details.** Architectures for encoder and decoder networks follow closely those used by Tolstikhin et al. [2018] and are summarized in the table D.2. All models had a latent space with  $d = 64$  dimensions. Training was carried out for 60 epochs using Adam optimizer [Kingma and Ba, 2015] with a constant learning rate:  $\epsilon = 0.001$  and a batch size equal to 64 images. We trained standard  $\beta$ -VAE models with  $\beta \in \{0.01, 0.1, 1.0, 4.0, 10.0, 30.0, 50.0\}$  and MMD-VAE models with  $\beta \in \{1.0, 4.0, 30.0, 50.0, 100.0, 200.0, 500.0, 1000.0\}$ .



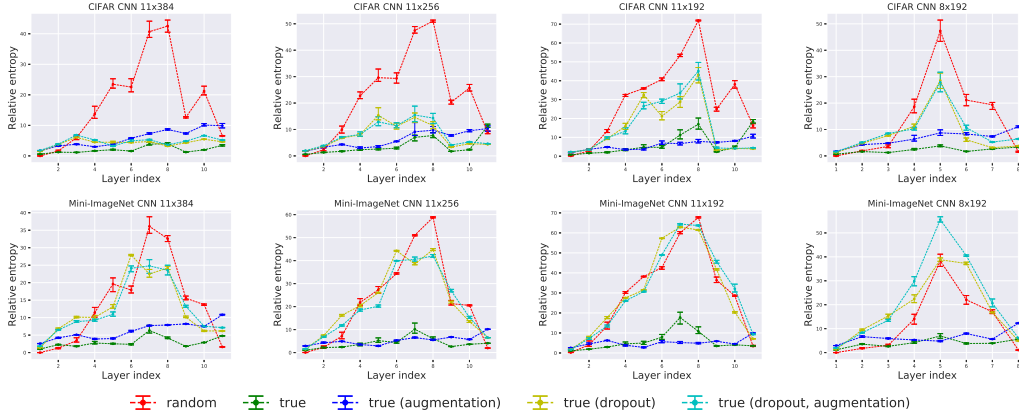

Figure C.1: Relative entropies of posterior predictive distributions for CNN representations. Results for CNN architectures not included in Section 4.

| Encoder                                   | Decoder                                                                             |
|-------------------------------------------|-------------------------------------------------------------------------------------|
| conv. $5 \times 5$ , $c = 128$ , $s = 2$  | Fully Connected: $8 \cdot 8 \cdot 1024$ (Celeb) or $12 \cdot 12 \cdot 1024$ (Anime) |
| conv. $5 \times 5$ , $c = 256$ , $s = 2$  | FS conv. $5 \times 5$ , $c = 512$ , $s = 2$                                         |
| conv. $5 \times 5$ , $c = 512$ , $s = 2$  | FS conv. $5 \times 5$ , $c = 256$ , $s = 2$                                         |
| conv. $5 \times 5$ , $c = 1024$ , $s = 2$ | FS conv. $5 \times 5$ , $c = 128$ , $s = 2$                                         |
| Fully Connected: $64 \cdot 2$             | FS conv. $5 \times 5$ , $c = 3$ , $s = 1$                                           |

Table D.2: Convolutional encoder and decoder architectures used in VAE experiments. FS conv. – fractionally strided convolution;  $c$  – number of output channels,  $s$  – stride. Each convolution and fractionally strided convolution is followed by a batch normalization and ReLU nonlinearity.

**Component counts in CGS traces.** Our primary tools for judging complexity of aggregated posteriors in VAE models are relative entropy and total correlation between dimensions in posterior predictive (Section 3). That said, findings from Section 5 are further supported by distributions of component counts in CGS traces, pictured in Fig. D.2. In standard  $\beta$ -VAEs, increasing regularization strength simplifies the set of inferred latent codes to the point where it can be explained (by DP-GMM) using just one component. In MMD-VAEs regularization has no obvious influence on the number of components in CGS traces. Note, however, that these results should be interpreted with care – specifically, they do not speak to the number of components in the data generating distribution. Indeed, Dirichlet Process is not consistent for the number of components [Miller and Harrison, 2013, 2014]. Rather, results in Fig. D.2 can be seen as the number of components (from an infinite mixture) observed in a finite set of available data points.

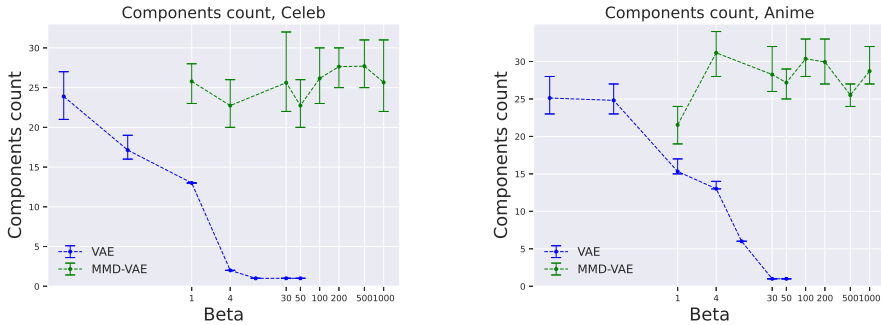

Figure D.2: Component counts in CGS traces for standard  $\beta$ -VAEs and MMD-VAEs. In each case we report mean, minimum and maximum component count across sampled CGS steps.

**Additional samples.** Figures D.3 and D.4 present additional image samples generated with latent codes drawn from a posterior predictive density  $p(z^* | c)$ .

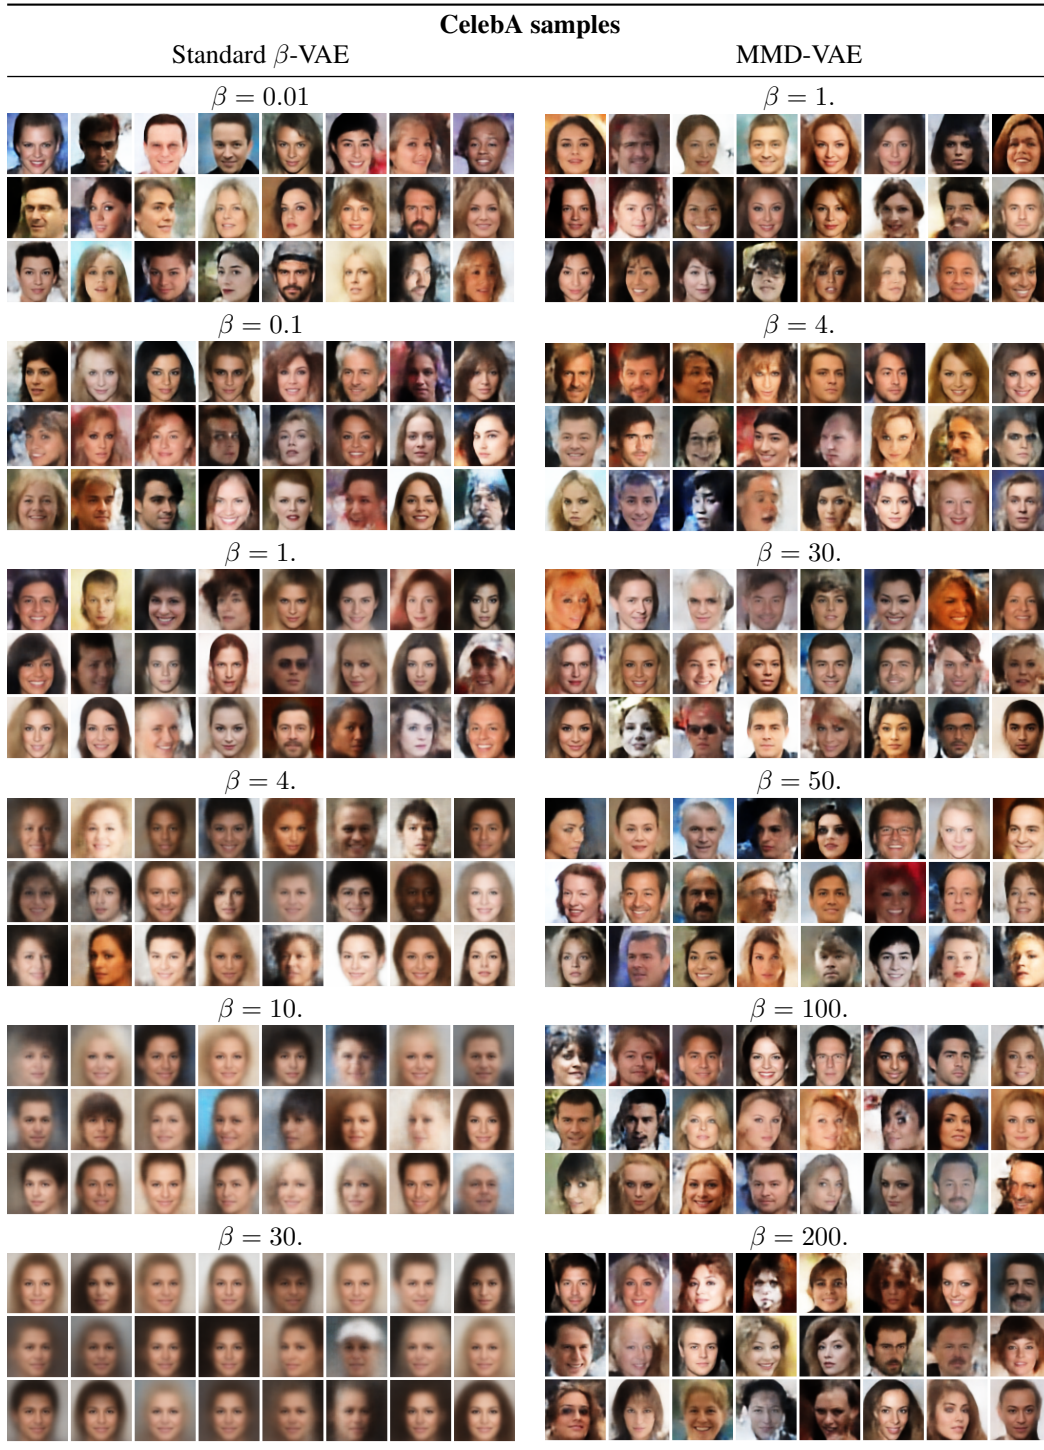

Figure D.3: CelebA samples generated with latent codes drawn from a posterior predictive density.



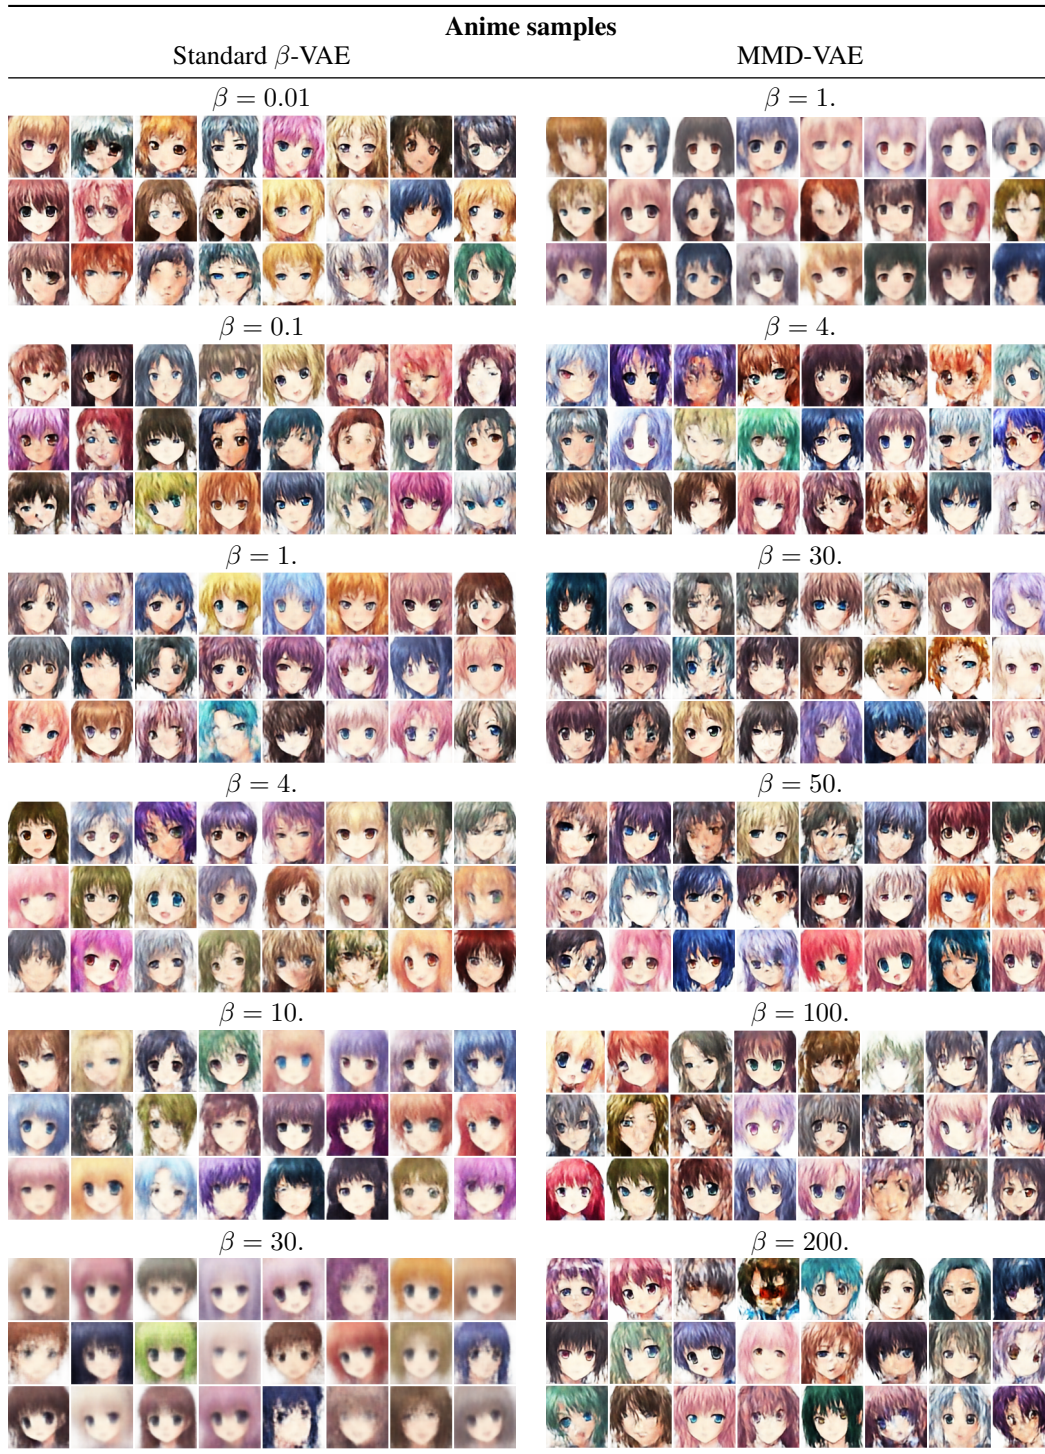

Figure D.4: Anime samples generated with latent codes drawn from a posterior predictive density.

## References

- A collection of high-quality anime faces. <https://github.com/Mckinsey666/Anime-Face-Dataset>. Accessed: 2020-05-01.
- Michael D Escobar and Mike West. Bayesian density estimation and inference using mixtures. *Journal of the American Statistical Association*, 90(430):577–588, 1995.
- Chris Fraley and Adrian E. Raftery. Bayesian regularization for normal mixture estimation and model-based clustering. *J. Classification*, 24(2):155–181, 2007.
- Diederik P. Kingma and Jimmy Ba. Adam: A method for stochastic optimization. In *3rd International Conference on Learning Representations, ICLR 2015, San Diego, CA, USA, May 7-9, 2015, Conference Track Proceedings*, 2015.
- Alex Krizhevsky. Learning multiple layers of features from tiny images. Technical report, 2009.
- Ziwei Liu, Ping Luo, Xiaogang Wang, and Xiaoou Tang. Deep learning face attributes in the wild. In *2015 IEEE International Conference on Computer Vision, ICCV 2015, Santiago, Chile, December 7-13, 2015*, pages 3730–3738. IEEE Computer Society, 2015.
- Jeffrey W. Miller and Matthew T. Harrison. A simple example of dirichlet process mixture inconsistency for the number of components. In *Advances in Neural Information Processing Systems 26: 27th Annual Conference on Neural Information Processing Systems 2013. Proceedings of a meeting held December 5-8, 2013, Lake Tahoe, Nevada, United States*, pages 199–206, 2013.
- Jeffrey W. Miller and Matthew T. Harrison. Inconsistency of pitman-yor process mixtures for the number of components. *Journal of Machine Learning Research*, 15(96):3333–3370, 2014.
- Kevin P. Murphy. Conjugate bayesian analysis of the gaussian distribution. Technical report, 2007.
- Kevin P. Murphy. *Machine learning - a probabilistic perspective*. Adaptive computation and machine learning series. MIT Press, 2012.
- Radford M Neal. Markov chain sampling methods for dirichlet process mixture models. *Journal of computational and graphical statistics*, 9(2):249–265, 2000.
- Ilya O. Tolstikhin, Olivier Bousquet, Sylvain Gelly, and Bernhard Schölkopf. Wasserstein auto-encoders. In *6th International Conference on Learning Representations, ICLR 2018, Vancouver, BC, Canada, April 30 - May 3, 2018, Conference Track Proceedings*, 2018.
- Oriol Vinyals, Charles Blundell, Tim Lillicrap, Koray Kavukcuoglu, and Daan Wierstra. Matching networks for one shot learning. In *Advances in Neural Information Processing Systems 29: Annual Conference on Neural Information Processing Systems 2016, December 5-10 2016, Barcelona, Spain*, pages 3630–3638, 2016.
